# Supplementary material for: Developing end-point methods for absolute binding free energy calculation using the Boltzmann-quasiharmonic model
Source: Royal Society of Chemistry journal article supplement (doi:10.1039/d1cp05075c), 2022-01-01
Supplement: d1cp05075c1.pdf [file d1cp05075c1.pdf]

# Supporting Information: Developing End-Point Methods for Absolute Binding Free Energy Calculation Using the Boltzmann-Quasiharmonic Model

1/29/2022

*Lauren Wickstrom*<sup>1</sup>, *Emilio Gallicchio*<sup>2,4,5</sup>, *Liyang Chen*<sup>3,4,5</sup>, *Tom Kurtzman*<sup>3,4,5</sup>, *Nanjie Deng*<sup>6\*</sup>

(1) Borough of Manhattan Community College, the City University of New York,  
Department of Science, New York, New York, USA

(2) Department of Chemistry, Brooklyn College, the City University of New York,  
Brooklyn, New York, USA

(3) Department of Chemistry, Lehman College, the City University of New York, Bronx,  
New York, USA

(4) PhD Program in Chemistry, Graduate Center of the City University of New York, New  
York, USA

(5) PhD Program in Biochemistry, Graduate Center of the City University of New York,  
New York, USA

(6) Department of Chemistry and Physical Sciences, Pace University, New York, New York,

USA

Table S1. The coefficient of determination  $R^2$  and averaged unsigned errors (AUE, in kcal/mol) in the absolute binding free energies from different end-point calculations relative to the experimental results. For comparison, the results obtained using the PMF method are also included.

|       | BQH/<br>PBSA | QHIC/<br>PBSA | QHCC/<br>PBSA | NMA/<br>PBSA | BQH/<br>3D-<br>RISM | QHIC/<br>3D-<br>RISM | QHCC/<br>3D-<br>RISM | NMA/<br>3D-<br>RISM | PMF <sup>b</sup> |
|-------|--------------|---------------|---------------|--------------|---------------------|----------------------|----------------------|---------------------|------------------|
| $R^2$ | 0.62         | 0.69          | 0.48          | 0.27         | 0.50                | 0.63                 | 0.32                 | 0.01                | 0.69             |
| AUE   | 2.40         | 1.98          | 3.11          | 8.99         | 5.53                | 4.80                 | 5.24                 | 13.23               | 1.48             |

Table S2. The coefficients of determination  $R^2$  in the estimated absolute binding free energies from the QHIC/PBSA and BQH/PBSA compared with the those reported in the SAMPL8 challenge<sup>a</sup>.

| Method                       | $R^2$ |
|------------------------------|-------|
| DDM/AMOEBA/BAR               | 0.78  |
| ATM/GAFF2-AM1BCC/TIP3P/HREM  | 0.79  |
| PMF/GAFF2-AM1BCC/TIP3P/MD-US | 0.69  |
| QHIC/PBSA <sup>b</sup>       | 0.69  |
| BQH/PBSA <sup>b</sup>        | 0.62  |
| AM1BCC/MMPBSA/TIP4PEW/MD     | 0.02  |
| ML/NNET/CORINA-descriptors-8 | 0.54  |
| SILCS/LGFE/TIP3P/GCMC-MD     | 0.26  |
| DDM/C36/TIP3P/MD/MBAR        | 0.034 |
| MD/ParamChem/TIP3P/REUS/     | 0.012 |

a. [https://github.com/samplchallenges/SAMPL8/blob/master/host\\_guest/Analysis/Ranked\\_Accuracy/GDCC/StatisticsTables/statistics.csv](https://github.com/samplchallenges/SAMPL8/blob/master/host_guest/Analysis/Ranked_Accuracy/GDCC/StatisticsTables/statistics.csv)

b. Reported in the present study.

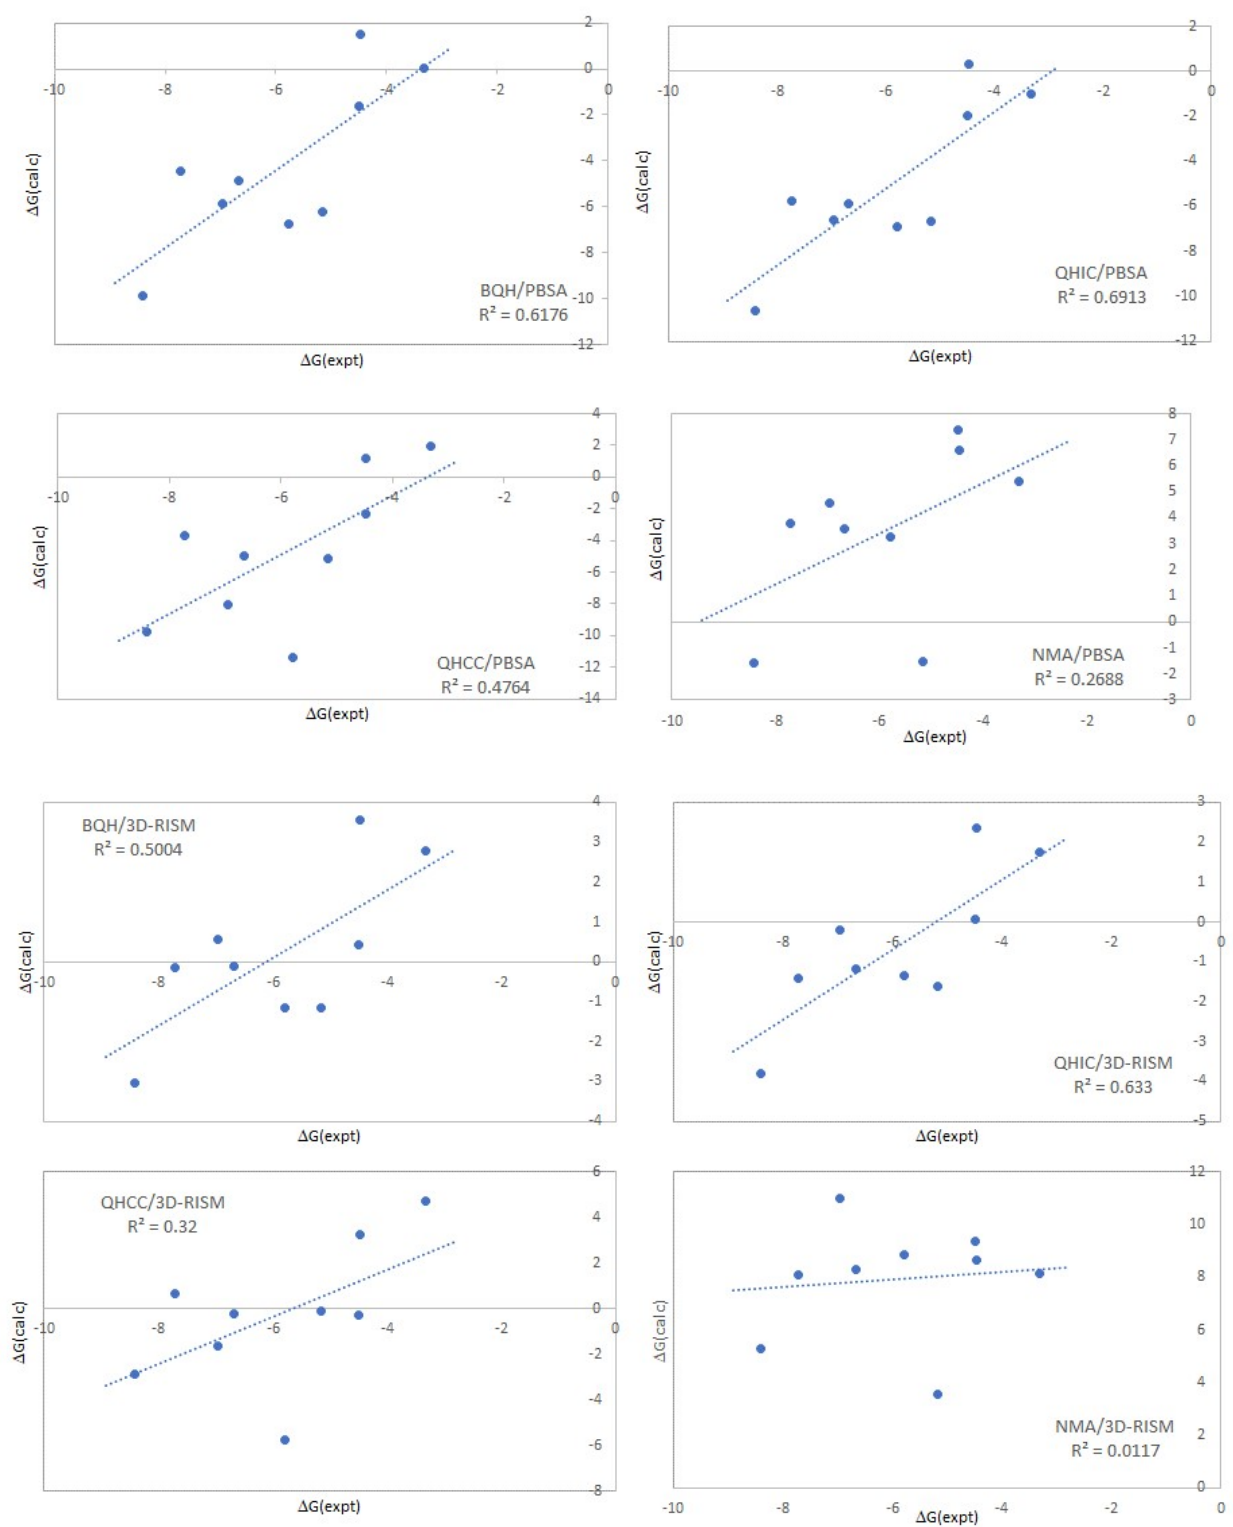

Figure S1. Correlations of the absolute binding free energies from the end-point calculations with the experimental values.

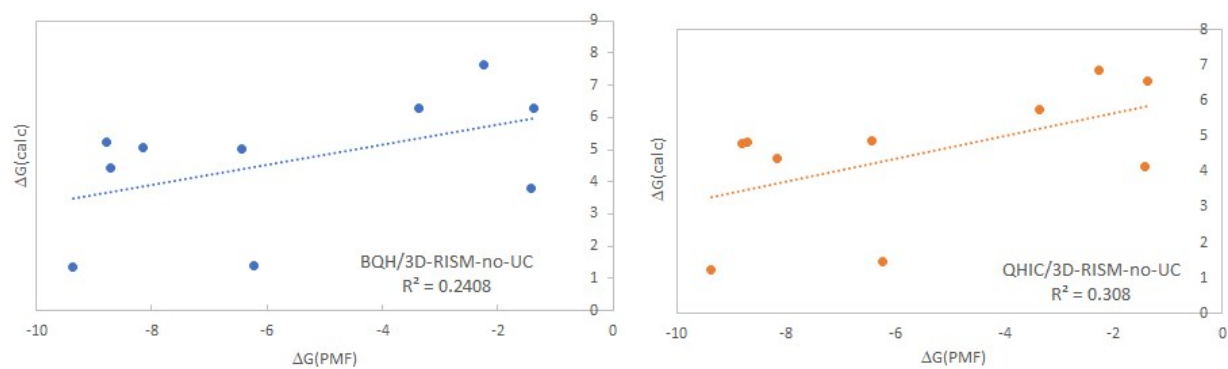

Figure S2. Correlations between the absolute binding free energies obtained using *BQH/3D-RISM* and *QHIC/3D-RISM* without the partial molar volume correction<sup>55, 56</sup> and the PMF results.
